# Supplementary material for: Reconciling single-chamber Mg / Ca with whole-shell δ 18 O in surface to deep-dwelling planktonic foraminifera from the Mozambique Channel
Source: Copernicus journal article supplement (doi:10.5194/bg-12-2411-2015), 2015-04-24
Supplement: Supplementary file 1 [file bg-12-2411-2015-supplement.zip]

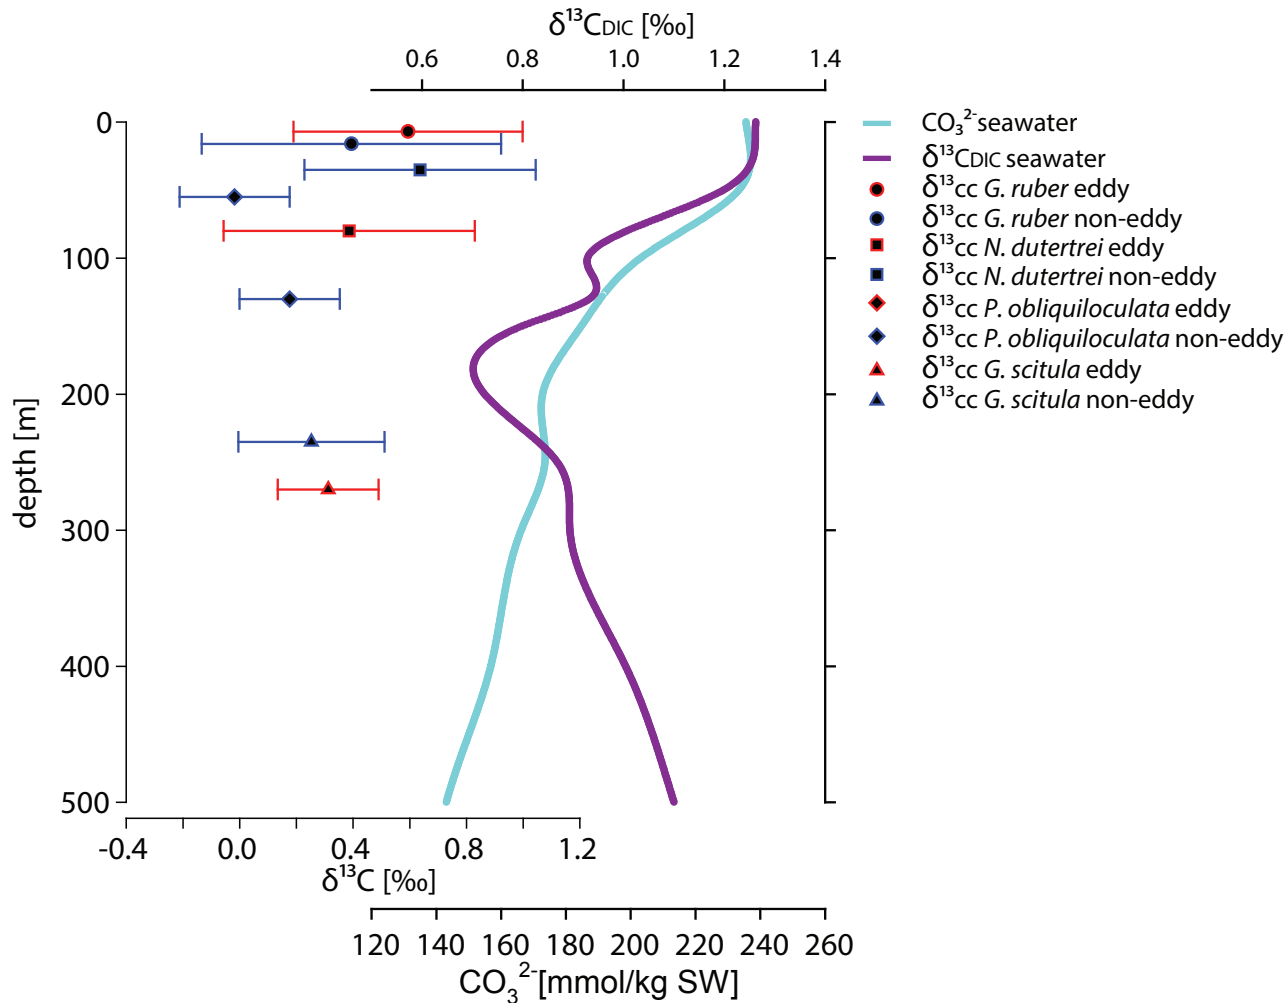

fig. S2: Spline interpolated seawater  $\delta^{13}\text{C}_{\text{DIC}}$  (purple line) and  $\text{CO}_3^{2-}$  (light blue line) for the Mozambique Channel. For comparison, means values of  $\delta^{13}\text{C}_{\text{CC}}$  for *G. ruber*, *N. dutertrei*, *P. obliquiloculata* and *G. scitula* for eddy (red) and non-eddy (blue) are plotted. Horizontal scale in middle indicates standard deviation. Data is plotted for the upper 500 m only.
