# Supplementary material for: Reconciling single-chamber Mg / Ca with whole-shell δ 18 O in surface to deep-dwelling planktonic foraminifera from the Mozambique Channel
Source: Copernicus journal article supplement (doi:10.5194/bg-12-2411-2015), 2015-04-24
Supplement: Supplementary file 2 [file bg-12-2411-2015-supplement.zip]

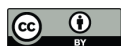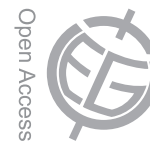

*Supplement of*

**Reconciling single-chamber Mg / Ca with whole-shell  $\delta^{18}\text{O}$  in surface to deep-dwelling planktonic foraminifera from the Mozambique Channel**

**J. Steinhardt et al.**

*Correspondence to:* J. Steinhardt (juliane.steinhardt@nioz.nl)

- bg-12-2411-2015-supplement-cover-letter.pdf
- Table S1.xlsx
- Table S3 data.xlsx
- Table. S2.xlsx
- figS1.pdf
- figS2.pdf
