# Supplementary material for: Reconciling single-chamber Mg / Ca with whole-shell δ 18 O in surface to deep-dwelling planktonic foraminifera from the Mozambique Channel
Source: Copernicus journal article supplement (doi:10.5194/bg-12-2411-2015), 2015-04-24
Supplement: Supplementary file 3 [file bg-12-2411-2015-supplement.zip]

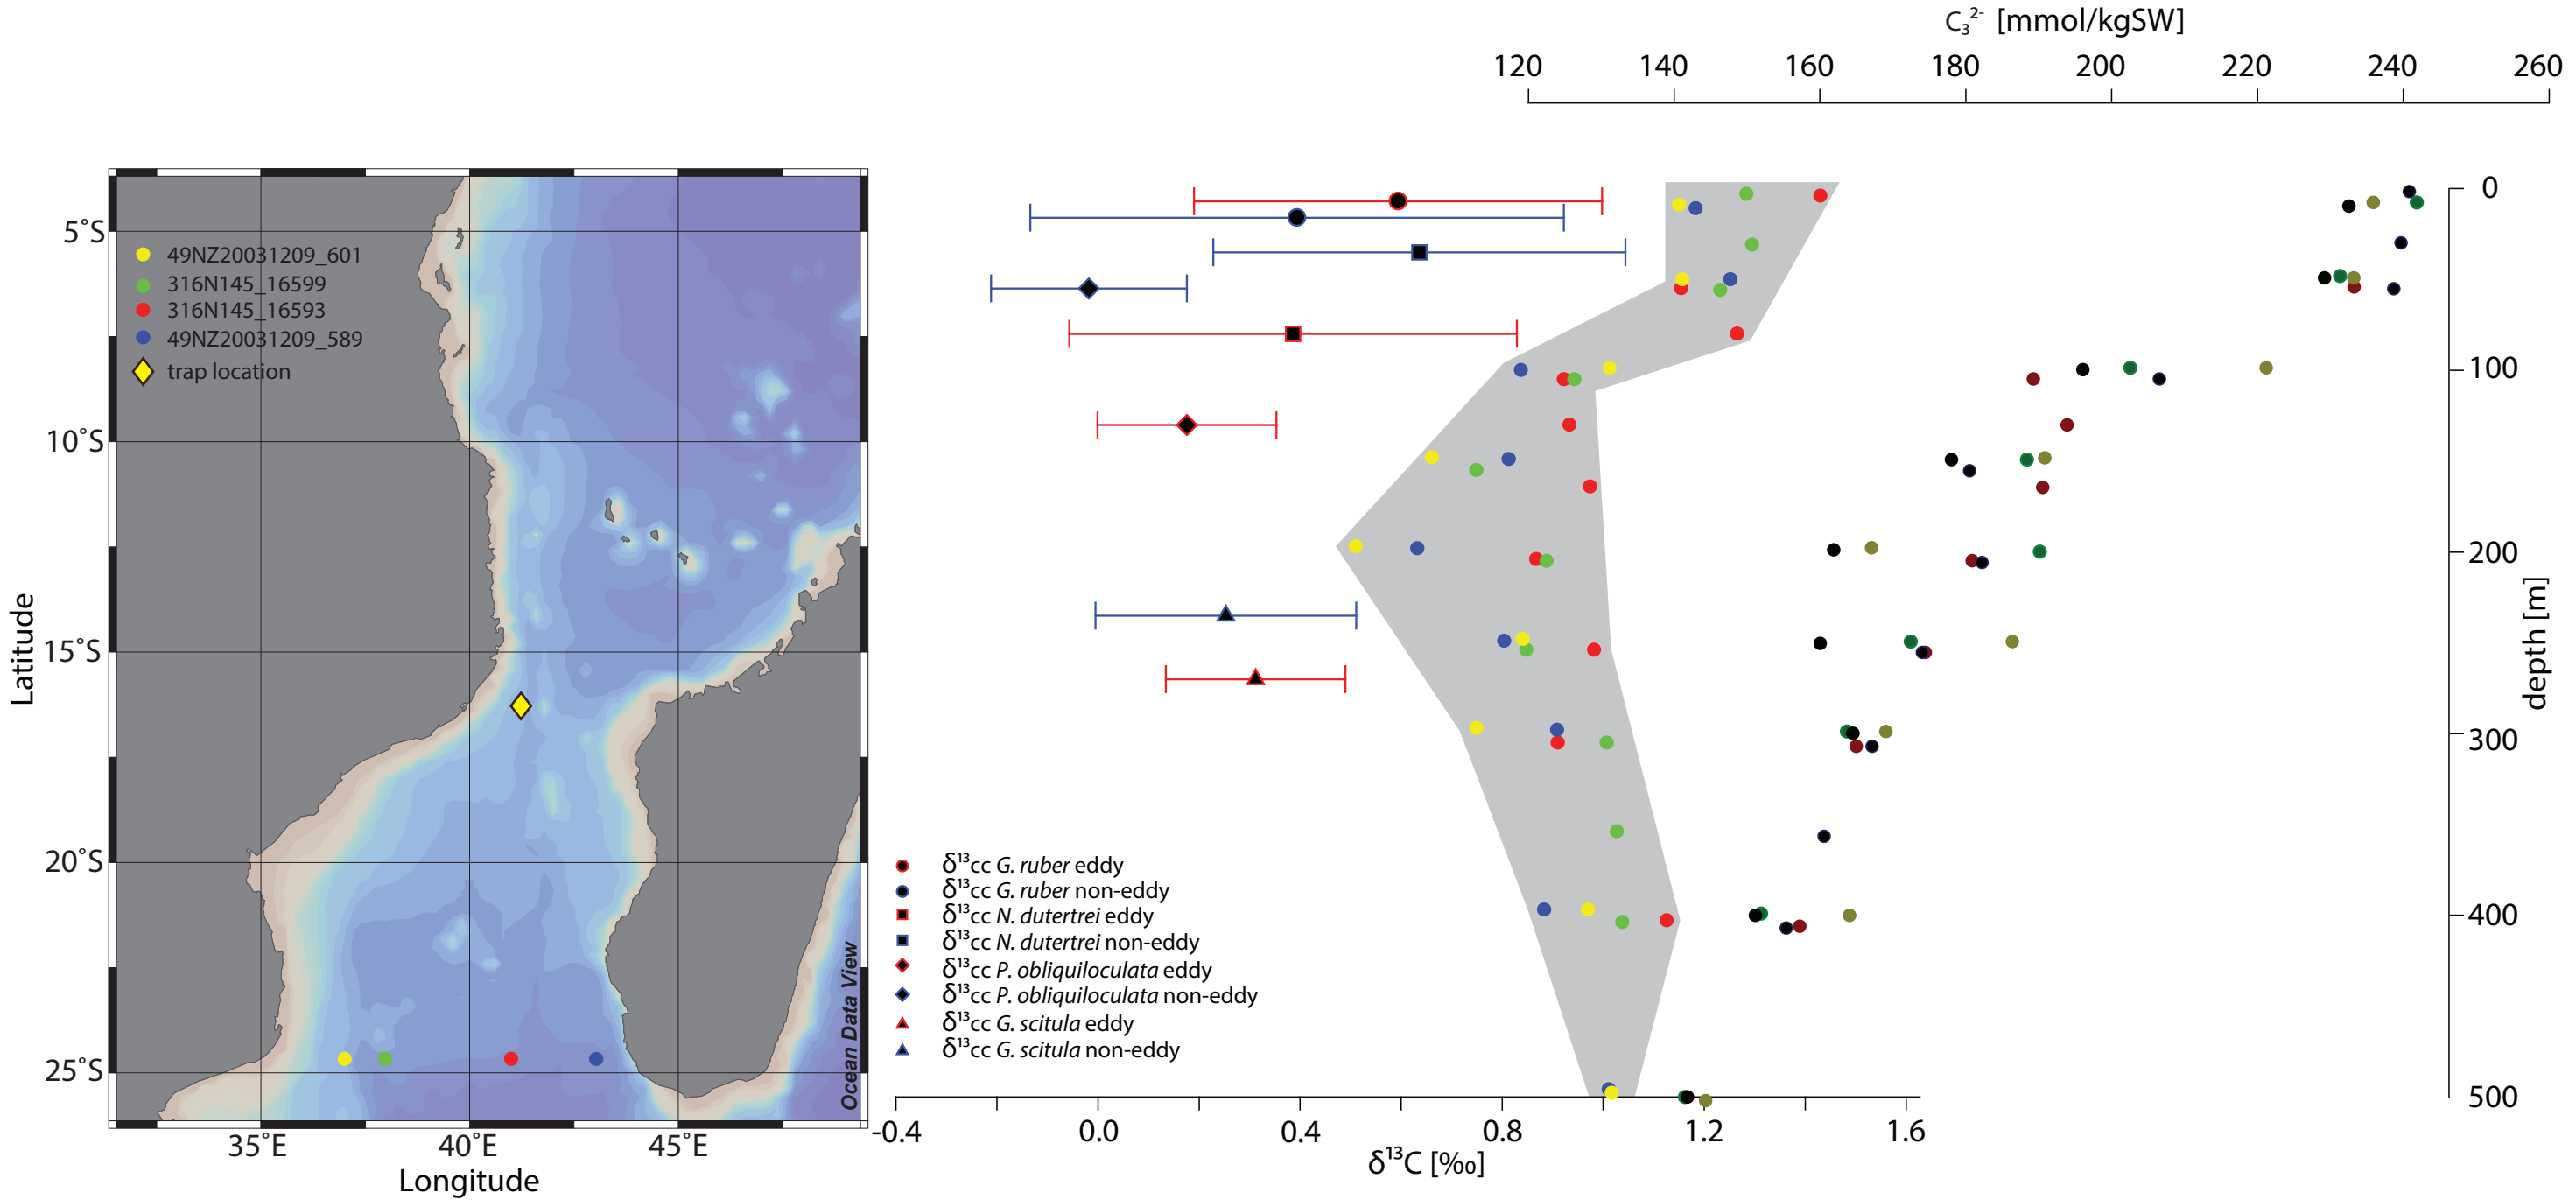

fig. S1: Map of sediment trap location (diamond) and locations of the the  $C_3^{2-}$  and  $\delta^{13}C_{DIC}$  data extracted from the World Ocean Database 2009. For comparison, means values of  $\delta^{13}C_{CC}$  for *G. ruber*, *N. dutertrei*, *P. obliquilocuata* and *G. scitula* for eddy (red) and non-eddy(blue) are plotted. Horizontal scale in middle indicates standard deviation. Data is plotted for the upper 500 m only.
